most of the year this inshore band is well mixed from surface to bottom and especially at the critical points off headlands and capes where the observations were usually made. However, the author had no data at his disposal to account for one important factor in his consideration of the question of stability. The inshore shallow band, especially in early spring, receives a considerable supply of fresh water from rivers. Thus the stability may at times become very marked due to the sudden increase in the amount of river water flowing southward along the shore. It seems questionable at such times whether, along a straight stretch of coastline, surface readings will always be indicative of the temperature, even at such slight depths as 10 fathoms. Only through a considerable number of subsurface temperature and salinity observations along the band of shallow water can this point be cleared up, and until they are available, we can accept P a r r's surface temperature diagrams as showing closely the thermal conditions down to 10 fathoms along this great stretch of coast line.

C. I.

**Takaharu Nomitsu.** "A Theory of the Rising Stage of Drift Current in the Ocean. I. The Case of No Bottom-Current; II. The Case of No Bottom-Friction". Mem. Coll. Sci., Kyoto Imp. Univ. Ser. A. Vol. XVI, Nos 2 & 4. Kyoto, 1933.

Der Verfasser entwickelt eine neue Methode zur theoretischen Bestimmung des Triftstromes bei plötzlich beginnendem oder aufgehörendem Wind unter der Annahme eines endlosen Meeres mit konstanter Tiefe. Für unendliche Tiefe hat Fredholm früher eine Lösung gegeben, und kürzlich hat Fjeldstad Methoden zur Behandlung des Problems der Entstehung der Triftströme in Meeren mit endlicher Tiefe entwickelt. Die neue Methode von Takaharu Nomitsu ist verhältnismässig einfach und übersichtlich. Die Theorie gibt eine sehr klare Darstellung sowohl von der Zunahme des Stromes bei beginnendem Wind wie von der Abnahme des Stromes bei aufgehörendem Wind. In Teil I wird das Problem unter der Voraussetzung, dass die Stromgeschwindigkeit am Boden Null ist, behandelt, in Teil II wird dasselbe Problem unter der Annahme von vollständiger Gleitung über den Boden (keine Bodenreibung) diskutiert und für konstante Reibungskoeffizienten gelöst. Von den Ergebnissen seien folgende erwähnt:

1) Bei plötzlich beginnendem (oder aufgehörendem) Wind vollführt der Strom eine Art von Schwingungen um seine endliche Grösse und Richtung mit einer Periode von 12 Pendelstunden. Unter der Annahme, dass kein Bodenstrom besteht, erreicht der winderzeugte Strom seinen schliesslichen Wert (entsprechend dem stationären Triftstrom von Ekman) nach dem Verlauf einer Zeit, die von der sog. Reibungstiefe  $D$  und der Meerestiefe abhängt, und zwar ungefähr nach folgenden Zeiten:

|                        |        |       |       |     |      |
|------------------------|--------|-------|-------|-----|------|
| Meerestiefe:           | $D/10$ | $D/4$ | $D/2$ | $D$ | $2D$ |
| Zeit in Pendelstunden: | 1      | 6     | 18    | 48  | 120  |

2) Im Falle, wo keine Bodenreibung besteht erreicht der Strom niemals den stationären Wert, sondern schwingt mit der gleichen Periode von 12 Pendelstunden um diesen Wert, und zwar so, dass der Hodograph einen asymptotischen Kreis hat, dessen Radius umgekehrt proportional zur Meerestiefe ist. Bei unendlicher Tiefe erhält man somit die gleiche Lösung wie im Falle 1.

3) Unter der Annahme, dass kein Bodenstrom besteht, wächst sowohl die Ablenkung wie die Geschwindigkeit des Triftstromes bei abnehmender

Meerestiefe. Die Verhältnisse sind somit in dieser Hinsicht entgegengesetzt den Verhältnissen bei Berücksichtigung der Bodenreibung.

Nach der Ansicht des Verfassers können die obigen zwei Spezialfälle von Bedeutung sein, wenn man auch annehmen muss, dass die wirklichen Verhältnisse in den Meeren zwischen diesen beiden extremen Annahmen liegen. Im Anschluss an den Fall mit konstantem Wind behandelt der Verfasser schliesslich auch den Fall mit variablem Wind, wo der Wind eine gegebene Funktion der Zeit ist. Hierbei benutzt er ein Theorem, das in anderem Zusammenhang veröffentlicht wird. Offenbar hat man in Zukunft weitere Entwicklung der Theorie zu erwarten, und zwar besonders unter näherer Berücksichtigung der wirklichen Reibungsverhältnisse in den Meeren.

*E. P.*

**Takaharu Nomitsu.** "On the Development of the Slope Current and the Barometric Current in the Ocean. I. The Case of No Bottom-Current". Mem. Coll. Sci., Kyoto Imp. Univ. Ser. A, Vol. XVI, No. 3. Kyoto, 1933.

Eine ähnliche Methode wie die oben besprochene für den Triftstrom wird vom Verfasser auch zur Untersuchung des Staustromes entwickelt. Bei einer plötzlich entstandenen Neigung der Meeresoberfläche entsteht ein Staustrom, der unter den angenommenen Voraussetzungen in betreff der Reibung asymptotisch um seine endliche Grösse und Richtung schwingt. Der Strom erreicht seinen schliesslichen Wert unter den gleichen Voraussetzungen in derselben Zeit wie der Triftstrom. Ganz kurz diskutiert der Verfasser schliesslich die von einem horizontalen Luftdruckgradienten über einem Ozean verursachte Strömung (barometric current) und äussert die Meinung, dass diese in den Weltmeeren von grösserer Bedeutung sein dürfte als im allgemeinen bisher angenommen worden ist.

*E. P.*

**Takaharu Nomitsu.** "On the Density Current in the Ocean. I. The Case of No Bottom-Current." Mem. Coll. Sci., Kyoto Imp. Univ. Ser. A, Vol. XVI, No. 4. Kyoto, 1933.

Der Verfasser definiert als Dichtestrom (density current) diejenige Strömung, die von einer lokalen Dichtedifferenz im Meere ohne Berücksichtigung einer Neigung der Meeresoberfläche verursacht wird, während der Konvektionsstrom dagegen von sowohl einem Dichtestrom als auch einem Staustrom zusammengesetzt ist. Die Behandlung des reinen Dichtestromes geschieht ganz analog wie die oben referierte Behandlung des Triftstromes und Staustromes. Beim Staustrom ist der Gradient im Wasser durch die Neigung der Meeresoberfläche bestimmt, beim Dichtestrom ist der Gradient in jedem Niveau eine Funktion des horizontalen Dichtegradienten. Da grössere Dichtegradienten nicht schnell entstehen können, wird eine Theorie der Entwicklung des Dichtestromes bei einem plötzlich entstandenen Solenoidfeld von nur geringer praktischer Bedeutung.

Unter Berücksichtigung der Begrenzungen der Meeresgebiete entwickelt sich aus einer reinen Dichteströmung allmählich eine kombinierte Dichte- und Staustromung, die gewöhnlich Konvektionsströmung genannt wird. In der Arbeit von Takaharu Nomitsu werden verschiedene Typen solcher Konvektionsströme theoretisch untersucht, und zwar im Anschluss an die speziellen von Ekman behandelten Typen. Die Theorie des Verfassers leitet zu Ergebnissen, die in gewissen Punkten von den Ekman'schen Resultaten abweichen. U. a. findet der Verfasser, dass
